# Supplementary material
Source: publisher site journal article supplement (https://www.dovepress.com/article/454043)
Supplement: Supplementary file 1 [file get_supplementary_file.php]

# Supplementary 1 – COREQ checklist

| **No. Item** | **Guide questions/description** | **Reported on Page #** |
| --- | --- | --- |
| **Domain 1: Research team and reﬂexivity** |  |  |
| *Personal Characteristics* |  |  |
| 1. Interviewer/facilitator | Which author/s conducted the interview or focus group? | 3 |
| 2. Credentials | What were the researcher’s credentials? E.g. PhD, MD | 3 |
| 3. Occupation | What was their occupation at the time of the study? | 3 |
| 4. Gender | Was the researcher male or female? | 3 |
| 5. Experience and training | What experience or training did the researcher have? | 3 |
| *Relationship with participants* |  |  |
| 6. Relationship established | Was a relationship established prior to study commencement? | 3 |
| 7. Participant knowledge of the interviewer | What did the participants know about the researcher? e.g. personal goals, reasons for doing the research | 3 |
| 8. Interviewer characteristics | What characteristics were reported about the inter viewer/facilitator? e.g. Bias, assumptions, reasons and interests in the research topic | 3 |

| **Domain 2: study design** |  |  |
| --- | --- | --- |
| *Theoretical framework* |  |  |
| 9. Methodological orientation and Theory | What methodological orientation was stated to underpin the study? e.g. grounded theory, discourse analysis, ethnography, phenomenology, content analysis | 3 |
| *Participant selection* |  |  |
| 10. Sampling | How were participants selected? e.g. purposive, convenience, consecutive, snowball | 3 |
| 11. Method of approach | How were participants approached? e.g. face-to-face, telephone, mail, email | 4 |
| 12. Sample size | How many participants were in the study? | 4 |
| 13. Non-participation | How many people refused to participate or dropped out? Reasons? | 3 |
| *Setting* |  |  |
| 14. Setting of data collection | Where was the data collected? e.g. home, clinic, workplace | 4 |
| 15. Presence of non-participants | Was anyone else present besides the participants and researchers? | 4 |
| 16. Description of sample | What are the important characteristics of the sample? e.g. demographic data, date | 5 |
| *Data collection* |  |  |
| 17. Interview guide | Were questions, prompts, guides provided by the authors? Was it pilot tested? | 3 |
| 18. Repeat interviews | Were repeat interviews carried out? If yes, how many? | 4 |
| 19. Audio/visual recording | Did the research use audio or visual recording to collect the data? | 4 |
| 20. Field notes | Were ﬁeld notes made during and/or after the interview or focus group? | 4 |
| 21. Duration | What was the duration of the interviews or focus group? | 4 |
| 22. Data saturation | Was data saturation discussed? | 4 |
| 23. Transcripts returned | Were transcripts returned to participants for comment and/or correction? | 4 |
| **Domain 3: analysis and ﬁndings** |  |  |
| *Data analysis* |  |  |
| 24. Number of data coders | How many data coders coded the data? | 4 |
| 25. Description of the coding tree | Did authors provide a description of the coding tree? | NA |
| 26. Derivation of themes | Were themes identiﬁed in advance or derived from the data? | 4 |
| 27. Software | What software, if applicable, was used to manage the data? | 4 |
| 28. Participant checking | Did participants provide feedback on the ﬁndings? | 4 |
| *Reporting* |  |  |
| 29. Quotations presented | Were participant quotations presented to illustrate the themes/ﬁndings? Was each quotation identiﬁed? e.g. participant number | 4 – 10 |
| 30. Data and ﬁndings consistent | Was there consistency between the data presented and the ﬁndings? | 10 – 12 |
| 31. Clarity of major themes | Were major themes clearly presented in the ﬁndings? | 4 – 10 |
| 32. Clarity of minor themes | Is there a description of diverse cases or discussion of minor themes? | 4 – 10 |

**Note**: Adapted from Tong A, Sainsbury P, Craig J. Consolidated criteria for reporting qualitative research (COREQ): a 32-item checklist for interviews and focus groups. *Int J Qual Health Care*. 2007;19(6):349-357, by permission of Oxford University Press.32

# Supplementary 2 – Topic guide A for older adults

**Ice-breaker**

1. What are your thoughts about fall prevention exercises for older adults?

**Recruitment**

1. What was your experience like of the community outreach program? (probe: the person doing the screening, the educational materials, the steps)
2. What do you think are some of the factors that might motivate/discourage older adults in participating in Steady Feet? (probe: Personally, what might have encouraged you to participate in this Steady Feet exercise?)

**Participation**

1. What made you decide not to sign up/reject the Steady Feet exercises? (Probe: what are some of your concerns?)
2. Could you share with us your experience of the assessment sessions? (Probe: what could be improved on)

**Closing**

1. Besides what had been discussed, what else do you think have worked well for the community outreach, recruitment, and assessments?
2. Any other suggestions for improvement?

# Supplementary 3 – Topic guide B for providers

**Planning/ Coordination**

1. As part of the Steady Feet/STEPS, what are your thoughts about it?
   - What do you think of the planning/arrangement/coordination of the STEPS program as a whole and the Steady feet sessions?
   - Did you get any support from the rehab, admin and other working committee?
     - How was information related to the program communicated to you? (Probe: timeliness and clarity of communication)
   - How do you find the support given? Please tell me more about it (Probe: Is the support given sufficient in facilitating your work? What can be improved?)

**Recruitment**

1. What do you think of recruitment process for the Steady Feet? (Probe: What did you hear from the participants of their experience about recruitment?
2. What do you think are some of the factors that might motivate/discourage older adults in participating in Steady Feet?
3. What can be improved?

**Steady Feet exercise classes**

1. What are your thoughts on the Steady Feet exercises? (Probe: too easy/ difficult for the participants, any issues teaching the exercises to the participants - specify any particular exercise)
2. How did the participants respond to the exercises? (Probe: interactions with trainers, duration and timing of the sessions, ability to complete exercise steps, adherence to instructions and involvement of caregivers)
3. What do you think are important for longer term sustainability of the class? (probe: trainers, finance, venue, social interactions, exercise classes and other participants, trainers, community and system level incentives)
4. Given an opportunity, would you conduct the exercise class differently? If yes, how would you conduct it? (probe: aspect of the class you would change and rationale for it

**Train the trainers**

1. What are your thoughts on the train-the-trainer program?

Probes: duration of the TTT, the objectives clearly spelt out, appropriateness of time to practice the assessment procedures before doing on your own, feedback provided by the TTT instructors during assessments and exercise class, protocol, working relationship, capability and consistency

**Closing**

1. Besides what had been discussed, what else do you think have worked well?

11. What are other difficulties that you faced?

12. Any other suggestions for improvement?
